# Supplementary material for: Dynamics of circulating tumor DNA represented by the activating and resistant mutations in epidermal growth factor receptor tyrosine kinase inhibitor treatment
Source: PubMed Central journal article supplement — Cancer Sci. 2016 Feb 18;107(3):353–8. doi: 10.1111/cas.12860 (PMC4814247; doi:10.1111/cas.12860), 2016-02-18
Supplement: CAS-107-353-s001.pdf [file CAS-107-353-s001.pdf]

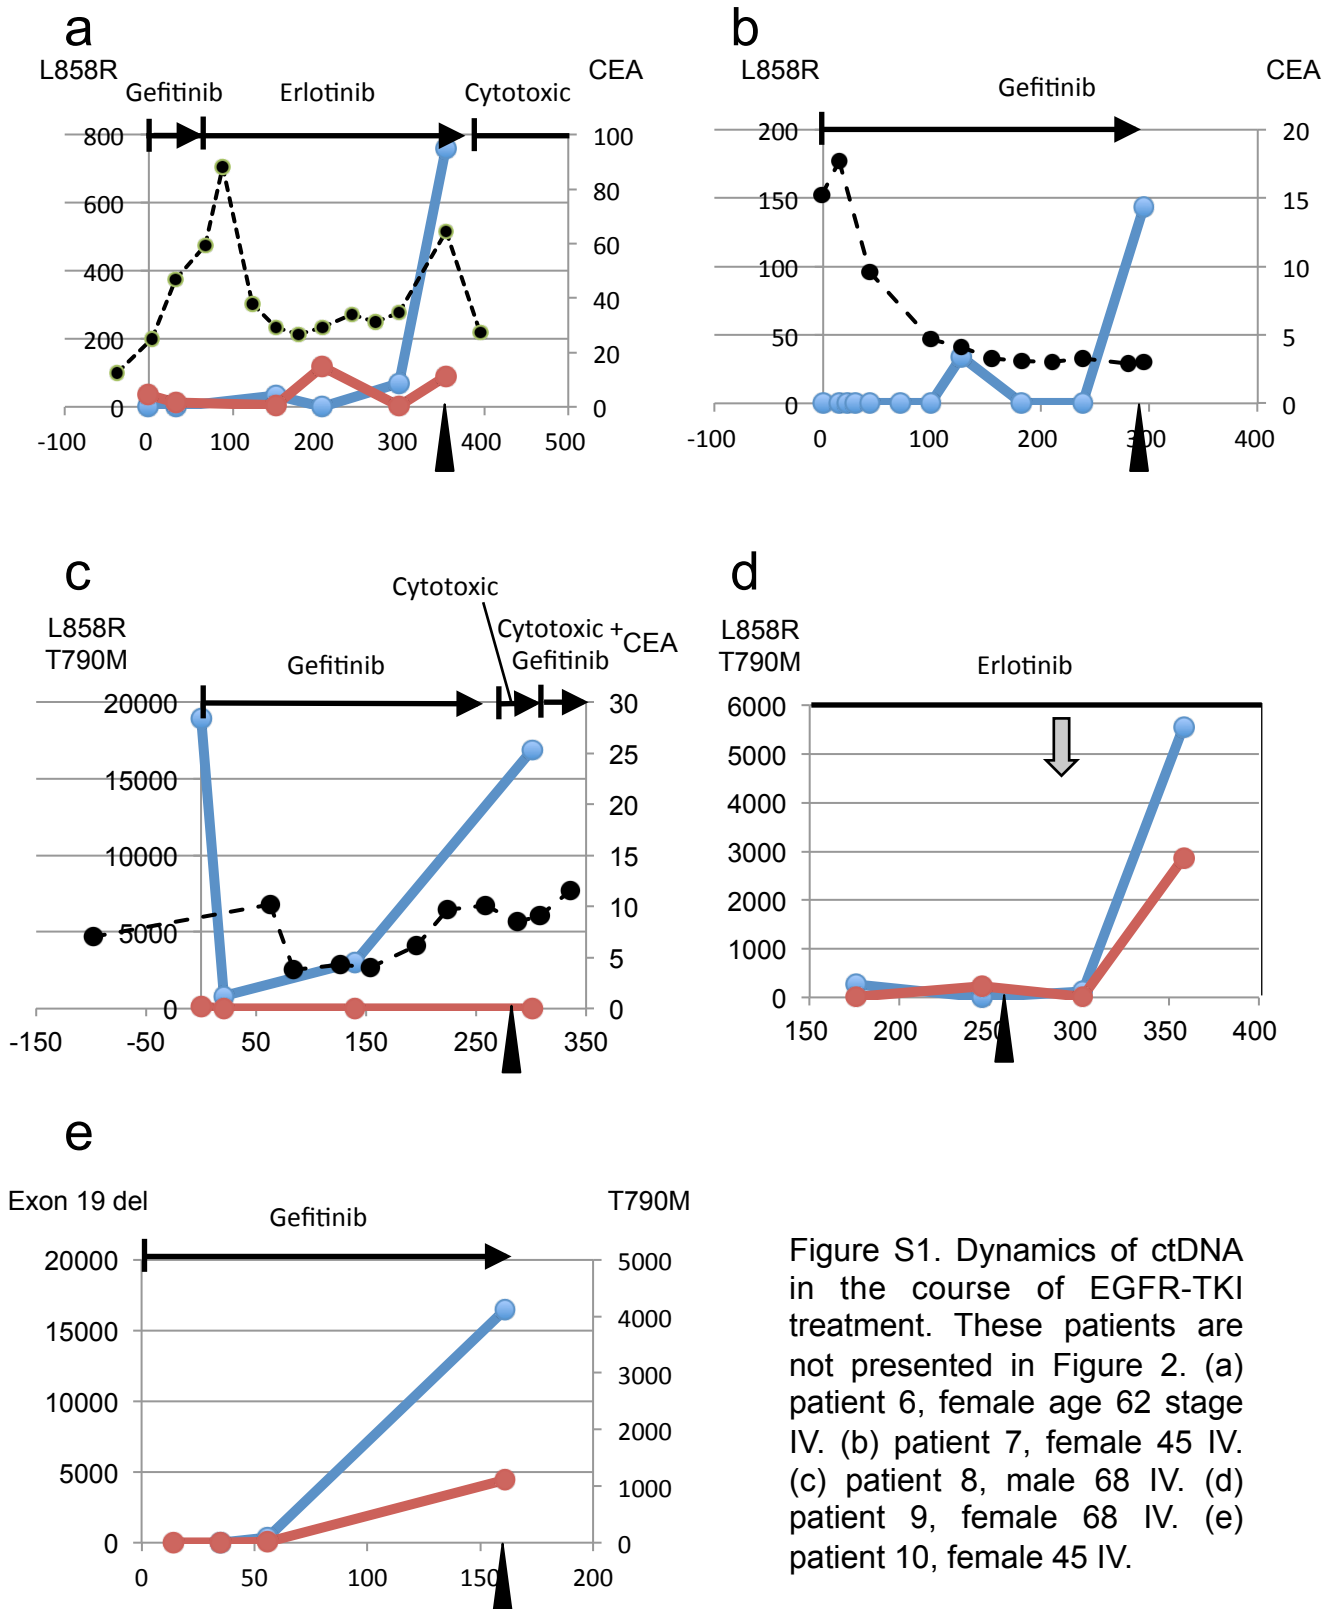

Figure S1. Dynamics of ctDNA in the course of EGFR-TKI treatment. These patients are not presented in Figure 2. (a) patient 6, female age 62 stage IV. (b) patient 7, female 45 IV. (c) patient 8, male 68 IV. (d) patient 9, female 68 IV. (e) patient 10, female 45 IV.
